# Supplementary material for: Electron beam irradiation modified carboxymethyl chitin microsphere-based hemostatic materials with strong blood cell adsorption for hemorrhage control
Source: Royal Society of Chemistry journal article supplement (doi:10.1039/d3bm00787a), 2023-01-01
Supplement: d3bm00787a1.pdf [file d3bm00787a1.pdf]

## Supplementary data:

### **Electron beam irradiation modified carboxymethyl chitin microsphere-based hemostatic material with strong blood cell adsorption for hemorrhage control**

Fan Leng <sup>a, b</sup>, Taotao Li <sup>b</sup>, Tongfei Li <sup>a</sup>, Cong Xie <sup>c, \*</sup>, Xulin Jiang <sup>b, \*</sup>

<sup>a</sup> *Department of Pharmacology, School of Basic Medical Sciences, Hubei University of Medicine, Shiyan 442000, China*

<sup>b</sup> *Key Laboratory of Biomedical Polymers of Ministry of Education & Department of Chemistry, Wuhan University, Wuhan 430072, China*

<sup>c</sup> *Hubei Key Laboratory of Radiation Chemistry and Functional Materials, Non-power Nuclear Technology Research and Development Center, Hubei University of Science and Technology, Xianning 437100, China*

\* Corresponding author:

Xulin Jiang

Key Laboratory of Biomedical Polymers of Ministry of Education & Department of Chemistry, Wuhan University, 299 Bayi Road, Wuhan 430072, China.

Cong Xie

Hubei Key Laboratory of Radiation Chemistry and Functional Materials, Non-power Nuclear Technology Research and Development Center, Hubei University of Science and Technology, 88 Xianning Road, Xianning 437100, China

E-mail address: xljiang@whu.edu.cn, Cong Xie: xiecong919@sina.com.cn.

Fan Leng: fanleng@whu.edu.cn, Taotao Li: taotao.li@whu.edu.cn, Tongfei Li: litongfeihappy@163.com.

## Methods

### *<sup>1</sup>H-NMR and FTIR*

The <sup>1</sup>H-NMR spectrum of CMCH was determined with a Mercury VX-300 spectrometer after degradation with 20% DCI at 60 °C for 24 h. The FTIR spectra of the microspheres were tested with PerkinElmer Spectrum One FTIR spectrophotometer (Waltham, USA).

### *Cytotoxicity assay*

Twenty milligrams of the microsphere sample were put into a tube with the medium at 37 °C for 24 h to obtain the supernatant as the conditioned medium. Two hundred microliters of cell suspension ( $3 \times 10^3$  NIH 3T3 cells) were transferred to the wells and incubated for 12 h in a 37 °C, 5% CO<sub>2</sub> cell incubator. 150 μL complete medium and 50 μL of the above-conditioned medium were added to replace the original medium. 20 μL of CCK-8 reagent was added and incubated for 2 h after 24 and 48 h co-cultivation. The optical density value of each well was measured by a SpectraMax<sup>®</sup> 190 microplate reader at 450 nm (Molecular Devices, USA).

### *In vivo degradation*

The SD rats (~250 g) were anesthetized by intraperitoneal injection of 10% chloral hydrate. The sterile CCM-g-AA@DA microspheres suspension (0.4 mL of 20 mg/mL) was injected into its subcutaneous tissue in the upper back through a 22 G needle. At predetermined time points, the tissue surrounding the implant was taken by scissors, and the remaining microspheres were checked and photographed. Each time point has 4 degradation sites.

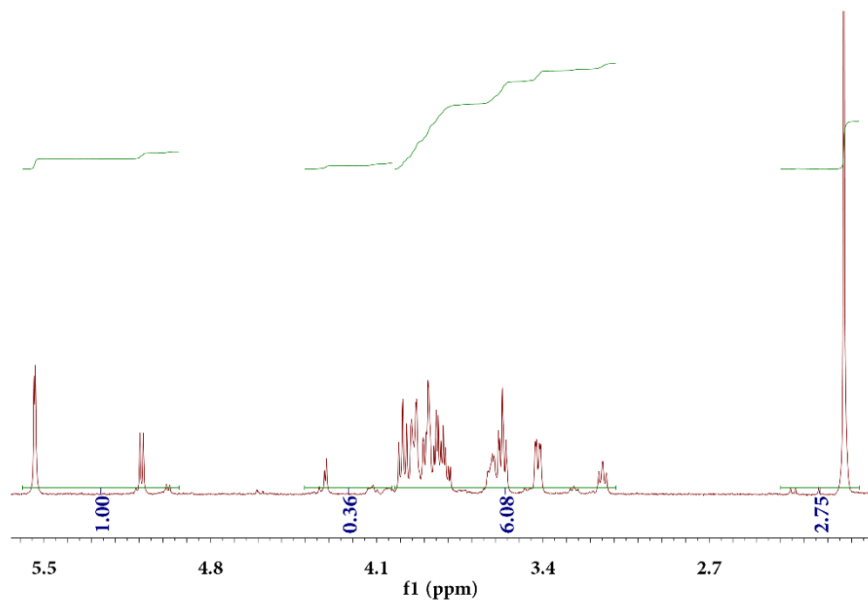

**Fig. S1**  $^1\text{H-NMR}$  spectrum of CMCH in 20% DCl/D<sub>2</sub>O.

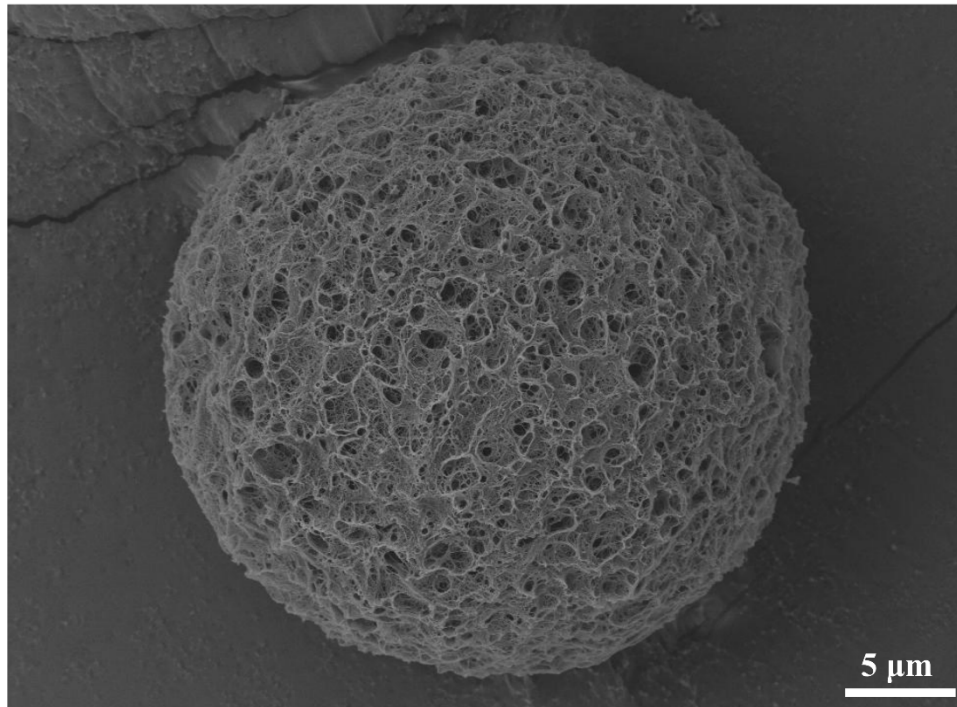

**Fig. S2** SEM image of the porous carboxymethyl chitin microsphere CCM. Scale bar: 5  $\mu\text{m}$ .

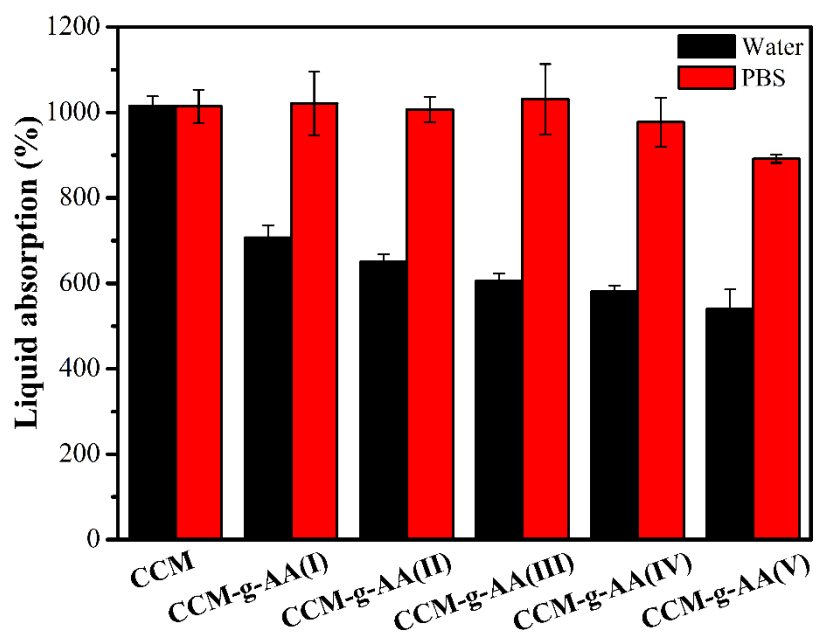

Fig. S3 Liquid absorption (30 s) of CCM-g-AA microspheres.

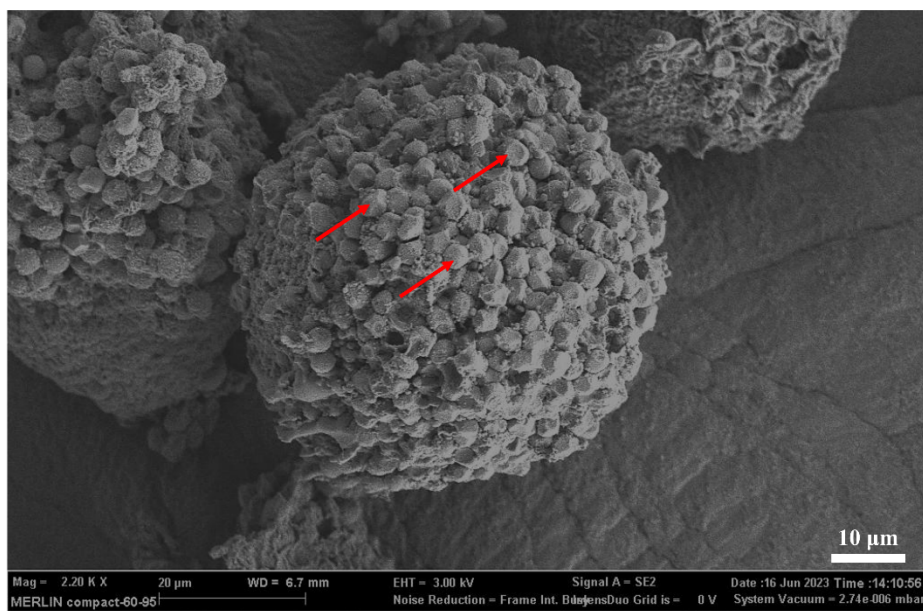

Fig. S4 SEM image of CCM-g-AA(IV) adsorbed red blood cells. Scale bar: 10 μm.

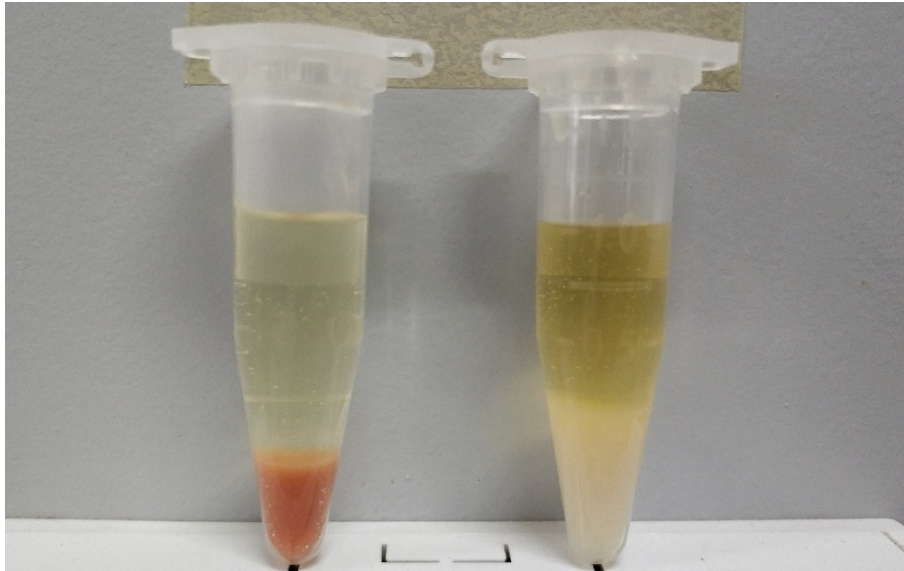

**Fig. S5** Adsorption capacity of the microspheres for  $\text{Fe}^{3+}$  (left: CCM-g-AA(IV), right: CCM).

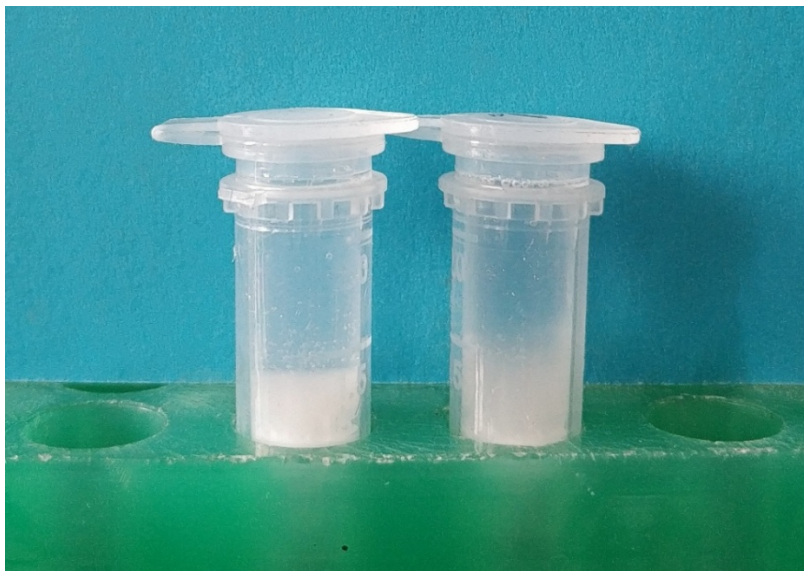

**Fig. S6** In vitro degradation of CCM-g-AA(IV) for 2 days with different concentrations of lysozyme (left: 0.2 mg/mL, right: 2 mg/mL).

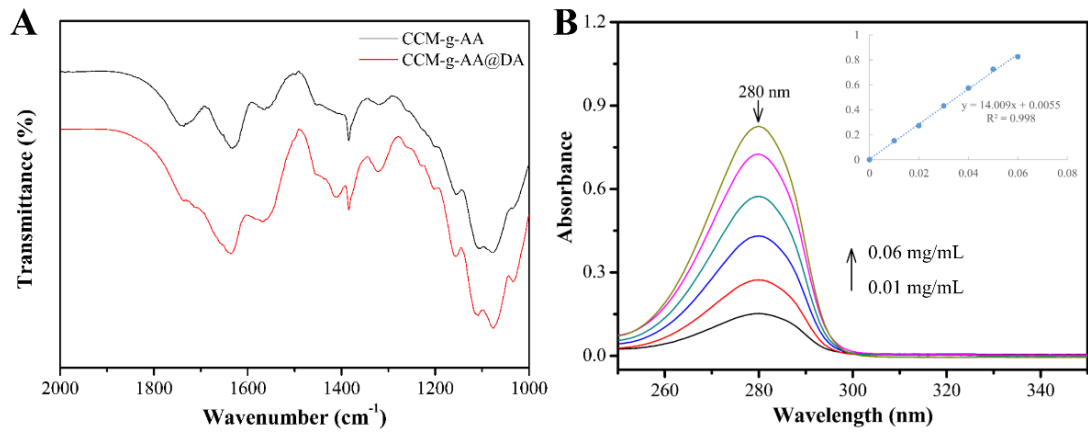

**Fig. S7** FTIR of CCM-g-AA@DA microspheres (A) and UV absorption spectra of dopamine (B).

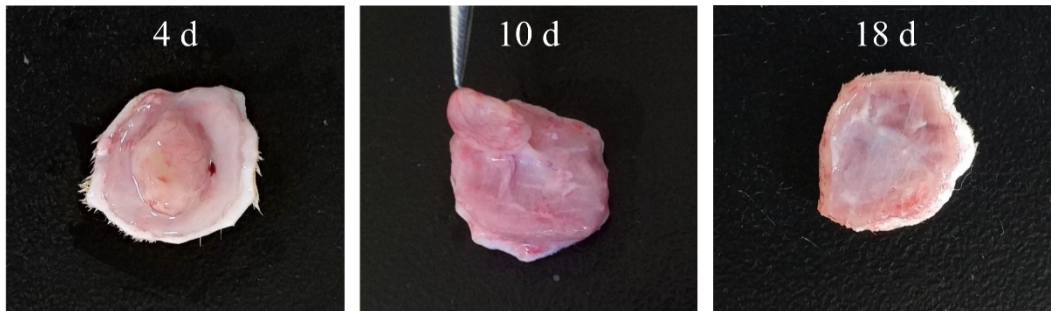

**Fig. S8** In vivo rat subcutaneous degradation of the CCM-g-AA@DA microspheres.

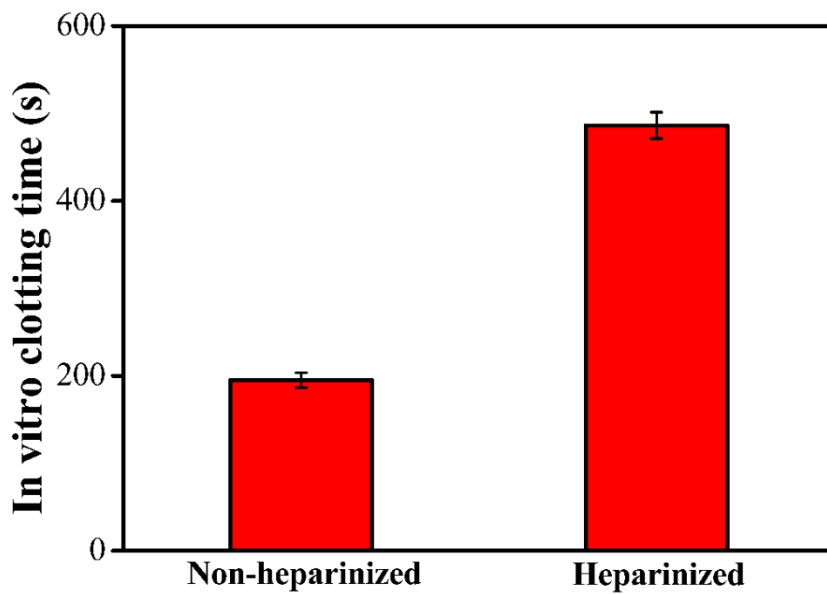

**Fig. S9** In vitro clotting time before and after heparin sodium treatment in SD rats. n = 4.
